# Supplementary material
Source: publisher figshare collection journal article supplement (https://acs.figshare.com/ndownloader/files/3598971)
Supplement: Supplementary file 1 [file 3598971]

## Supporting Information

for

### CO<sub>2</sub> Capture Performance and Attrition Property of CaO-based Pellets Manufactured from Organometallic Calcium Precursors by Extrusion

*Changlei Qin,<sup>†</sup> Hong Du,<sup>‡</sup> Liang Liu,<sup>§</sup> Junjun Yin,<sup>†</sup> and Bo Feng<sup>\*†</sup>*

<sup>†</sup>School of Mechanical and Mining Engineering, The University of Queensland, St Lucia, Queensland 4072,  
Australia

<sup>‡</sup>School of Biological Sciences, The University of Queensland, St Lucia, Queensland 4072, Australia

<sup>§</sup>School of Chemical Engineering, The University of Queensland, St Lucia, Queensland 4072, Australia

---

\*Corresponding author. Email: [b.feng@uq.edu.au](mailto:b.feng@uq.edu.au). Phone: +61-7-33469193. Fax: +61-7-33654799.

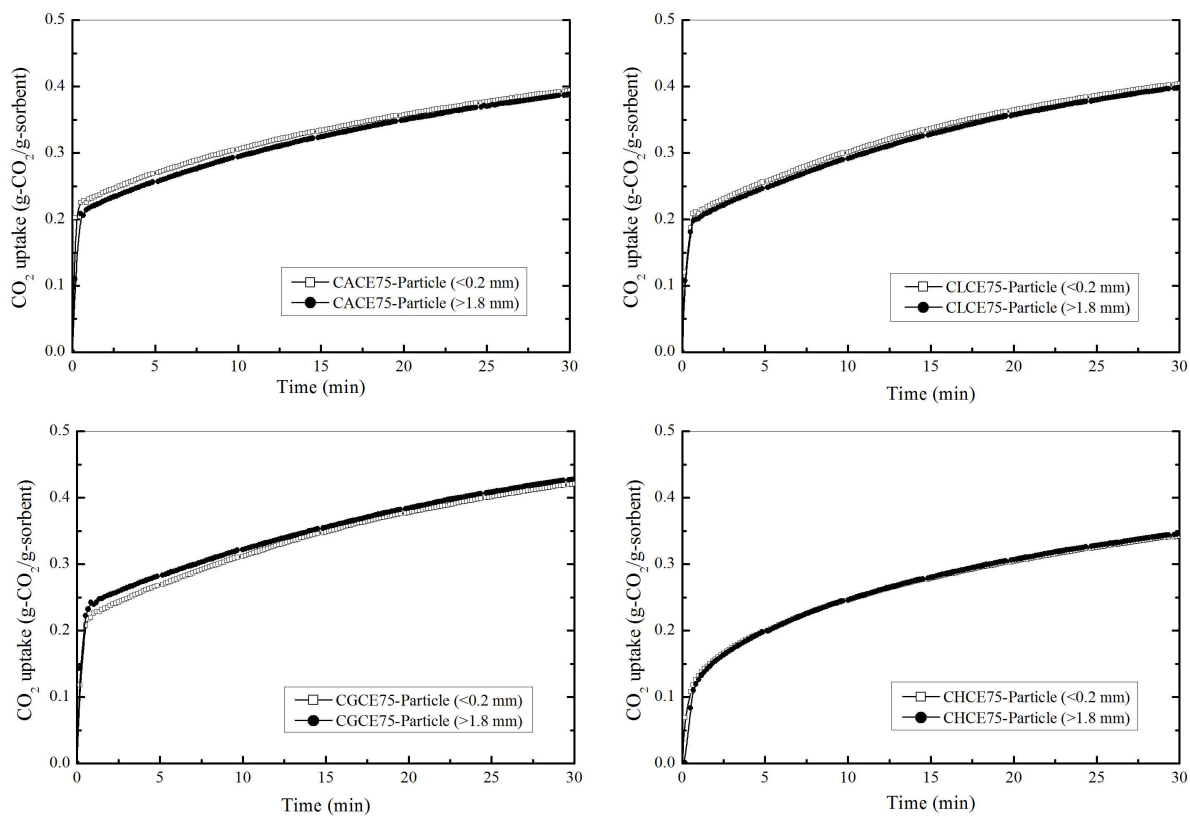

Figure S1. CO<sub>2</sub> uptake profile of different sized sorbent pellets as a function of time in the first cycle.

Calcination was performed at 900 °C, with 100% N<sub>2</sub> for 10 min; carbonation was performed at 650

°C with 15% CO<sub>2</sub> for 30 min.
